# Supplementary material
Source: publisher figshare collection journal article supplement (https://asha.figshare.com/ndownloader/files/31509350)
Supplement: Supplementary file 1 [file 31509350]

## Sheet: Sheet1
Participant_x_Item-level reliability
	Inter-rater Cohen's kappa (n = 9)								Intra-rater Cohen's kappa (n = 9)
	mean	SD	min	max	r	p			mean	SD	min	max	r	p			Inter-rater Confusion Matrix										Intra-rater Confusion Matrix											Inter-rater Jaccard Indices											Intra-rater Jaccard Indices
All	0.8142	0.161	0.5233	1				All	0.86	0.1195	0.6669	0.9869					C	S	U	F	N	M	AN	NA			C	S	U	F	N	M	AN	NA				Denominator											Denominator
C	0.8819	0.0988	0.7486	1	0.76	0.017		C	0.9683	0.0284	0.92	1	0.74	0.023		C	866	0	0	10	20	0	0	7		C	479	0	0	3	8	1	0	2				C	S	U	F	N	M	AN	NA				C
S	0.9708	0.0319	0.92	1	-0.0026	0.99		S	0.9822	0.0303	0.9086	1	0.29	0.45		S	3	30	2	0	0	3	1	4		S	1	55	3	2	0	1	0	4		Numerator	C	0.903	0.0566	0.0185	0.2174	0.176	0.0769	0.0092	0.0709		Numerator	C	0.9504
U	0.9492	0.0878	0.7371	1	-0.84	0.0042		U	0.9162	0.1163	0.7143	1	-0.86	0.0029		U	1	1	14	4	4	0	2	8		U	0	1	107	10	2	0	8	7			S	0.0031	0.566	0.0556	0	0	0.1923	0.0367	0.0284			S	0.002
F	0.901	0.0993	0.76	1	-0.95	0.0001		F	0.9213	0.0763	0.7714	1	-0.58	0.1		F	15	0	3	37	12	1	0	6		F	2	0	5	106	13	0	0	1			U	0.001	0.0566	0.2593	0.0609	0.0215	0	0.055	0.0638			U	0
N	0.8502	0.1593	0.5086	1	-0.63	0.066		N	0.9187	0.059	0.84	1	0.25	0.51		N	21	0	1	17	115	0	20	6		N	3	0	3	7	227	0	10	0			F	0.0261	0	0.1296	0.3217	0.1245	0.0385	0.0275	0.0461			F	0.0099
M	0.9848	0.0162	0.9543	1	0.36	0.34		M	0.9873	0.0166	0.9543	1	0.21	0.58		M	2	2	0	0	1	14	0	1		M	1	0	1	5	0	25	0	1			N	0.0428	0	0.0926	0.2522	0.4936	0.0385	0.3028	0.0319			N	0.0218
AN	0.9213	0.1305	0.6914	1	-0.86	0.0027		AN	0.9111	0.1157	0.7029	1	-0.25	0.51		AN	1	3	4	3	13	0	47	10		AN	1	1	14	1	11	0	156	13			M	0.0021	0.0943	0	0.0087	0.0043	0.5385	0	0.0106			M	0.004
NA	0.8908	0.1568	0.4971	1	-0.15	0.7		NA	0.9048	0.1078	0.7486	1	-0.63	0.069		NA	13	4	10	7	3	2	5	196		NA	3	1	12	13	7	0	11	227			AN	0.001	0.0755	0.1111	0.0261	0.1416	0	0.4312	0.0532			AN	0.002
																																					NA	0.0209	0.1509	0.3333	0.113	0.0386	0.1154	0.1376	0.695			NA	0.0099
Participant-level reliability (summed over items)
	Inter-rater Agreement (n = 9)							Intra-rater Agreement (n = 9)
	Rater 1 mean	Rater 1 SD	Rater 2 mean	Rater 2 SD	Difference mean	Difference SD	r			Rater 1 mean	Rater 1 SD	Rater 2 mean	Rater 2 SD	Difference mean	Difference SD	r
C	100.333	69.2279	102.444	70.1215	-2.1111	7.0257	0.995		C	54.7778	51.1023	54.4444	51.0591	0.3333	2.5	0.9988
S	4.7778	3.2702	4.4444	2.9202	0.3333	0.7071	0.9802		S	7.3333	11.7367	6.4444	11.7804	0.8889	1.5366	0.9915
F	3.7778	6.0369	3.7778	7.3956	0	2.2913	0.9619		F	15	17.4356	16.1111	18.738	-1.1111	4.6488	0.9695
M	8.2222	8.9691	8.6667	9.5131	-0.4444	2.2973	0.9708		M	14.1111	9.9303	16.3333	12.2372	-2.2222	4.2361	0.9481
U	20	29.8077	18.6667	30.1621	1.3333	6.9821	0.973		U	27.7778	27.036	29.7778	27.5671	-2	3.1623	0.9935
N	2.2222	1.6415	2.2222	0.9718	0	1	0.8271		N	3.6667	3.7417	3	4.0311	0.6667	1.2247	0.9531
AN	9	16.0234	8.3333	15.5161	0.6667	3.1225	0.9809		AN	21.8889	37.0386	20.5556	36.7087	1.3333	4.5826	0.9923
NA	26.6667	42.4735	26.4444	44.2835	0.2222	5.38	0.9932		NA	30.4444	29.4581	28.3333	26.6271	2.1111	3.9511	0.9952
[truncated: 7 more columns]
